# Supplementary material
Source: PubMed Central journal article supplement (PMC1744742)
Supplement: straninf_79_5_399__1.pdf [file straninf_79_5_399__1.pdf]

## CORRECTION

**Table 2** Comparison of susceptibility and PPNG of *N gonorrhoeae* isolated in Guangzhou during 1996–2001

| Year | No   | Penicillin |           |            | Spectinomycin |       | Ceftriaxone |           | Ciprofloxacin |           |            | PPNG (%)   |           |
|------|------|------------|-----------|------------|---------------|-------|-------------|-----------|---------------|-----------|------------|------------|-----------|
|      |      | S (%)      | I (%)     | R (%)      | S (%)         | R (%) | S (%)       | I (%)     | R (%)         | S (%)     | I (%)      |            | R (%)     |
| 1996 | 201* | 17 (8.4)   | 69 (34.3) | 115 (57.2) | 199 (99)      | 2 (1) | 120 (62.5)  | 72 (37.5) | 0 (0)         | 37 (18.6) | 127 (63.8) | 35 (17.6)  | 4 (2)     |
| 1997 | 51   | 2 (3.9)    | 13 (25.5) | 36 (70.6)  | 51 (100)      | 0 (0) | 40 (78.4)   | 11 (21.6) | 0 (0)         | 2 (3.9)   | 18 (35.3)  | 31 (60.8)  | 1 (2)     |
| 1998 | 203  | 1 (0.5)    | 81 (39.9) | 121 (59.6) | 203 (100)     | 0 (0) | 122 (60.1)  | 81 (39.9) | 0 (0)         | 16 (7.9)  | 64 (31.5)  | 123 (60.6) | 7 (3.4)   |
| 1999 | 167  | 3 (1.6)    | 24 (14.4) | 140 (83.8) | 167 (100)     | 0 (0) | 153 (91.6)  | 14 (8.4)  | 0 (0)         | 5 (3.0)   | 31 (18.6)  | 131 (78.4) | 9 (5.4)   |
| 2000 | 61   | 0 (0)      | 17 (27.9) | 44 (72.1)  | 61 (100)      | 0 (0) | 50 (81.9)   | 11 (18.0) | 0 (0)         | 0 (0)     | 15 (24.6)  | 46 (75.4)  | 10 (16.4) |
| 2001 | 110  | 1 (0.9)    | 19 (17.3) | 90 (81.8)  | 110 (100)     | 0 (0) | 90 (81.8)   | 20 (18.2) | 0 (0)         | 2 (1.8)   | 28 (25.5)  | 80 (72.7)  | 24 (21.8) |

\*192 strains were tested for ceftriaxone and 199 for ciprofloxacin.
